# Supplementary material for: Metallofullerene single-molecule magnet Dy2O@C2v(5)-C80 with a strong antiferromagnetic Dy⋯Dy coupling
Source: Royal Society of Chemistry journal article supplement (doi:10.1039/d1cc07176a), 2022-01-01
Supplement: d1cc07176a1.pdf [file d1cc07176a1.pdf]

## **Metallofullerene single-molecule magnet Dy<sub>2</sub>O@C<sub>2v</sub>(5)-C<sub>80</sub> with a strong antiferromagnetic Dy...Dy coupling**

Georgios Velkos,<sup>‡a</sup> Wei Yang,<sup>‡a,b</sup> Yang-Rong Yao,<sup>b</sup> Svetlana M. Sudarkova,<sup>a,c</sup> Fupin Liu,<sup>a</sup> Stanislav M. Avdoshenko,<sup>\*a</sup> Ning Chen<sup>\*b</sup> and Alexey A. Popov<sup>\*a</sup>

### **Supporting Information**

|                                                              |     |
|--------------------------------------------------------------|-----|
| Synthesis and isolation of Dy <sub>2</sub> O@C <sub>80</sub> | S2  |
| Additional SC-XRD data                                       | S3  |
| Computational studies                                        | S5  |
| Magnetization relaxation times                               | S7  |
| Additional details on magnetic measurements                  | S12 |

## Synthesis and isolation of Dy<sub>2</sub>O@C<sub>80</sub>

Dy<sub>2</sub>O@C<sub>80</sub> was synthesized by a modified Krätschmer-Huffman DC arc-discharge method. The carbon rod filled with 1.27 g of Dy<sub>2</sub>O<sub>3</sub> powder and 2.3 g of graphite powder (molar ratio of Dy/C = 1:24) was vaporized under a He/CO<sub>2</sub> atmosphere (200 Torr of helium with 20 Torr of CO<sub>2</sub> added). The soot was collected and refluxed in carbon disulfide (CS<sub>2</sub>) under an argon atmosphere for 12 h. The crude extract was treated with TiCl<sub>4</sub>, which removed most of the empty fullerenes. Dy<sub>2</sub>O@C<sub>80</sub> was isolated and purified by multistage high-performance liquid chromatography (HPLC) as in Figure S1.

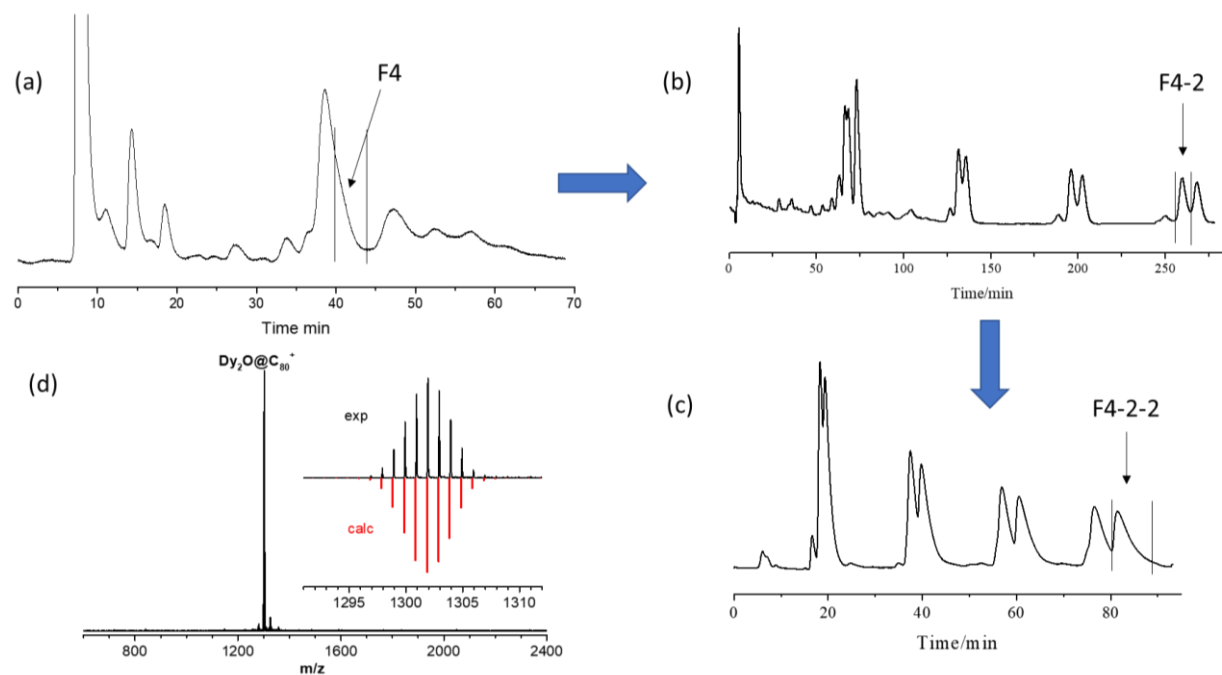

**Figure S1.** HPLC separation of Dy<sub>2</sub>O@C<sub>80</sub>. (a) The first stage HPLC chromatogram of the extract on a Buckyprep-M column ( $\Phi = 25 \text{ mm} \times 250 \text{ mm}$ , flow rate 10 mL/min). (b) the second stage recycling HPLC chromatogram of fraction F4 on a Buckyprep column ( $\Phi = 10 \text{ mm} \times 250 \text{ mm}$ , flow rate 4 mL/min). (c) the third stage recycling HPLC chromatogram of fraction F4-2 on a Buckyprep-D column ( $\Phi = 10 \text{ mm} \times 250 \text{ mm}$ , flow rate 4 mL/min). Fraction F4-2-2 is Dy<sub>2</sub>O@C<sub>80</sub>, Eluent = toluene, detecting wavelength = 310 nm. (d) MALDI-TOF mass-spectrum of Dy<sub>2</sub>O@C<sub>80</sub> in a positive-ion mode, the inset shows experimental and calculated isotopic distribution for Dy<sub>2</sub>O@C<sub>80</sub>.

### Crystallographic data

Fullerene molecules usually rotate in the crystals, resulting in a strong disorder. For this reason, the structural elucidation by single-crystal X-ray diffraction is usually performed for co-crystals with the agents, which hinder this rotation. Particular popular co-crystallization agent in fullerene chemistry is Ni<sup>II</sup> octaethylporphyrin, NiOEP. In this work, Dy<sub>2</sub>O@C<sub>2v</sub>(5)-C<sub>80</sub>•Ni(OEP) crystals were grown by layering the benzene solution of Ni(OEP) onto the saturated CS<sub>2</sub> solution of Dy<sub>2</sub>O@C<sub>80</sub> in a glass tube. The tube was then sealed with Teflon and placed into refrigerator with the temperature of 5-10°C. After the two solutions diffused together over a period of 3-4 weeks, the black block crystals were obtained in the tube walls. The crystal was measured at 100 K using synchrotron radiation (0.82653 Å) at the beamline BL17B of the Shanghai Synchrotron Radiation Facility (SSRF). The structure was solved using direct methods and refined on F<sup>2</sup> using full-matrix least-squares using the SHELXL2015 crystallographic software package. The disordered solvent molecules are masked with SQUEEZE code. Hydrogens were inserted at calculated positions and constrained with isotropic thermal parameters.

**Table S1.** Crystallographic information

|                                      | Dy <sub>2</sub> O@C <sub>2v</sub> (5)-C <sub>80</sub> • Ni(OEP)         |
|--------------------------------------|-------------------------------------------------------------------------|
| <b>Formula</b>                       | C <sub>116</sub> H <sub>44</sub> Dy <sub>1.97</sub> N <sub>4</sub> Ni O |
| <b>Formula weight</b>                | 1888.79                                                                 |
| <b>Color, habit</b>                  | Black, block                                                            |
| <b>Crystal system</b>                | monoclinic                                                              |
| <b>Space group</b>                   | P 2 <sub>1</sub> /c                                                     |
| <b>a, Å</b>                          | 17.757(4)                                                               |
| <b>b, Å</b>                          | 16.954(3)                                                               |
| <b>c, Å</b>                          | 26.591(5)                                                               |
| <b>α, deg</b>                        | 90                                                                      |
| <b>β, deg</b>                        | 107.35(3)                                                               |
| <b>γ, deg</b>                        | 90                                                                      |
| <b>Volume, Å<sup>3</sup></b>         | 7641(3)                                                                 |
| <b>Z</b>                             | 4                                                                       |
| <b>T, K</b>                          | 100                                                                     |
| <b>Radiation (λ, Å)</b>              | 0.71073                                                                 |
| <b>Unique data (R<sub>int</sub>)</b> | 12494                                                                   |
| <b>Parameters</b>                    | 1207                                                                    |
| <b>Restraints</b>                    | 1438                                                                    |
| <b>Observed data</b>                 | 11016                                                                   |
| <b>R<sub>1</sub><sup>a</sup></b>     | 0.1492                                                                  |
| <b>wR<sub>2</sub><sup>b</sup></b>    | 0.3428                                                                  |
| <b>CCDC No.</b>                      | 2085187                                                                 |

<sup>a</sup>For observed data with  $I > 2\sigma(I)$ ,  $R_1 = \frac{\sum ||F_o| - |F_c||}{\sum |F_o|}$ . <sup>b</sup>For all data,  $wR_2 = \sqrt{\frac{\sum [w(F_o^2 - F_c^2)^2]}{\sum [w(F_o^2)]}}$ .

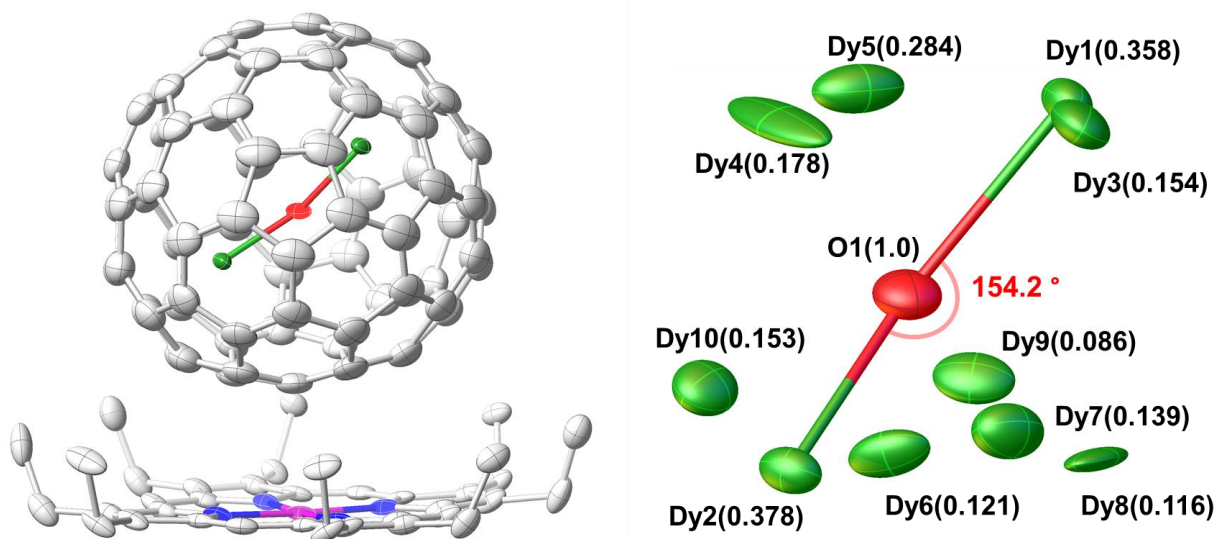

**Figure S2.** Left: Thermal ellipsoids of  $\text{Dy}_2\text{O}@C_{2v}(5)-C_{80} \text{Ni}^{\text{III}}(\text{OEP})$  crystals with 30% probability showing only the major dysprosium sites; H atoms and minor Dy sites are omitted, Dy is green, O is red, Ni is purple, N is blue, C is grey. Right: Endohedral  $\text{Dy}_2\text{O}$  unit with disordered Dy sites and selected structural parameters.

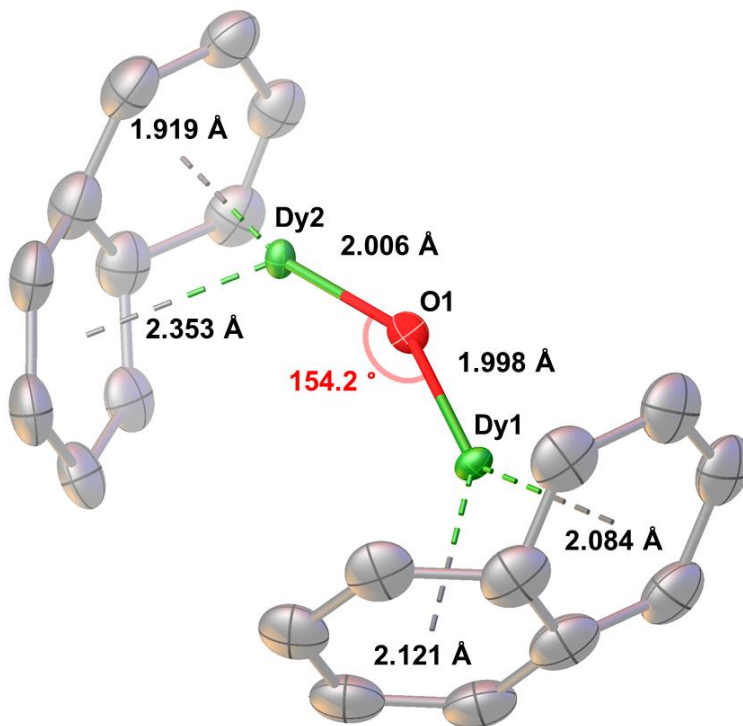

**Figure S3.** Interaction of the major  $\text{Dy}_2\text{O}$  site with the closest cage moieties.

## DFT calculations

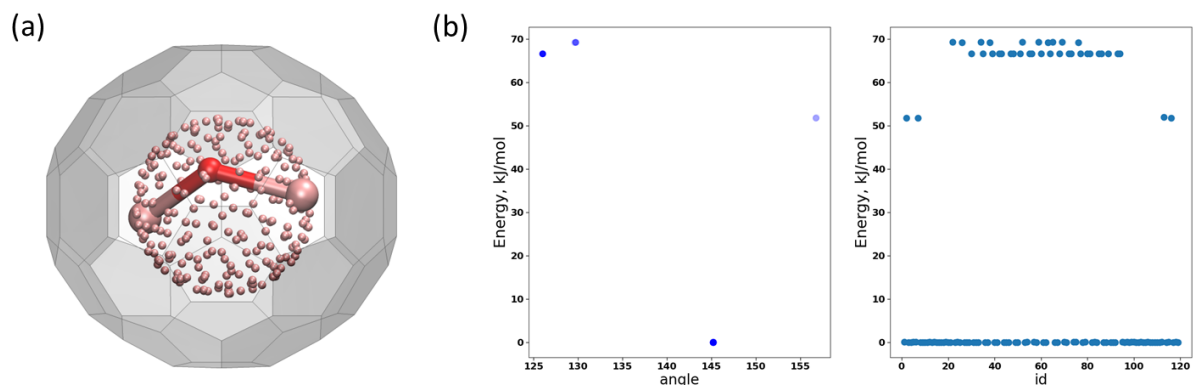

**Figure S4.** (a) 120 orientations of the  $Y_2O$  cluster inside the  $C_{2v}(5)-C_{80}$  cage (shown overlaid in one figure) used as starting coordinates in the search of stable conformers. DFT optimization of 120 structures gave four unique conformers. (b) Y–O–Y angles and relative energies in four unique conformers and relative energies of all optimized structures

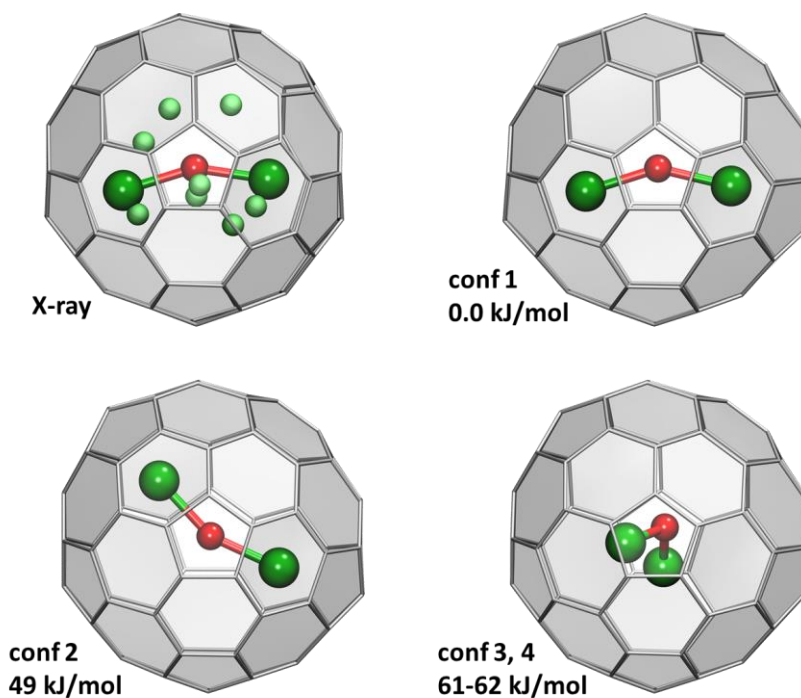

**Figure S5.**  $Dy_2O@C_{80}$  molecules from the X-ray structure (the site with the largest occupancies of Dy atoms is shown in dark green, whereas minor sites are pale green) and conformers of  $Dy_2O@C_{80}$  found in DFT calculations (**conf 3** and **conf 4** have very similar arrangement of the  $Dy_2O$  cluster and are not distinguishable by eye). For the sake of comparison, orientation of the fullerene cage is the same in all figures. One of the symmetry planes of the cage is parallel to the paper, and the  $Dy_2O$  cluster in the lowest-energy conformer is lying in this plane.

### CASSCF/SO-RASSI calculations of single-ion ligand field states

Single-ion magnetic properties were computed using MOLCAS at the CASSCF/SO-RASSI level with the (9,7) active space treating one Dy centre at a time and replacing the other Dy with Y, i.e. computations were performed for DyYO@C<sub>80</sub> molecule, in which atomic coordinates were from the DFT-optimized Dy<sub>2</sub>O@C<sub>80</sub>.

**Table S2.** *Ab initio* computed ligand-field splitting energies for two Dy ions in Dy<sub>2</sub>O@C<sub>2v</sub>(5)-C<sub>80</sub>, and their wavefunction composition in  $|m_J\rangle$  basis

| KD    | $E, \text{cm}^{-1}$ | <b>Dy-1, <math> m_J\rangle</math> composition, %<sup>a</sup></b> | $E, \text{cm}^{-1}$ | <b>Dy-2, <math> m_J\rangle</math> composition, %<sup>a</sup></b> |
|-------|---------------------|------------------------------------------------------------------|---------------------|------------------------------------------------------------------|
| 1     | 0                   | 99.8 15/2⟩                                                       | 0                   | 99.9 15/2⟩                                                       |
| 2     | 409                 | 97.6 13/2⟩                                                       | 419                 | 99.3 13/2⟩                                                       |
| 3     | 779                 | 90.6 11/2⟩ + 6.0 9/2⟩                                            | 798                 | 96.5 11/2⟩ + 2.4 7/2⟩                                            |
| 4     | 1064                | 80.8 9/2⟩ + 9.7 7/2⟩ + 4.7 11/2⟩                                 | 1088                | 53.4 9/2⟩ + 37.1 −9/2⟩                                           |
| 5     | 1243                | 68.6 7/2⟩ + 13.7 3/2⟩ + 6.9 5/2⟩                                 | 1282                | 76.4 7/2⟩ + 18.9 3/2⟩ + 3.3 11/2⟩                                |
| 6     | 1325                | 35.9 5/2⟩ + 33.0 1/2⟩ + 18.5 −5/2⟩                               | 1372                | 48.8 5/2⟩ + 34.8 1/2⟩ + 7.3 9/2⟩                                 |
| 7     | 1340                | 41.8 3/2⟩ + 21.3 1/2⟩ + 12.3 −1/2⟩                               | 1394                | 45.3 1/2⟩ + 35.2 −3/2⟩ + 10.4 5/2⟩                               |
| 8     | 1409                | 42.2 3/2⟩ + 16.6 1/2⟩ + 14.2 −1/2⟩                               | 1466                | 39.4 3/2⟩ + 27.2 −5/2⟩ + 16.2 −1/2⟩                              |
|       |                     | $d(\text{Dy-O}) = 2.0384 \text{ \AA}$                            |                     | $d(\text{Dy-O}) = 2.052 \text{ \AA}$                             |
|       |                     | <b>KD-1</b>                                                      |                     | <b>KD-1</b>                                                      |
| $g_x$ |                     | 0.000042171                                                      |                     | 0.000202639                                                      |
| $g_y$ |                     | 0.000047903                                                      |                     | 0.000232279                                                      |
| $g_z$ |                     | 19.867619380                                                     |                     | 19.869816558                                                     |

<sup>a</sup> only 3 largest contributions are listed

Geometrical angle Dy–O–Dy: 145.2°

Angle between quantization axes of **KD-1** states: 143.1° (36.9°)

### Magnetization relaxation times

SQUID magnetometry measurements were performed with Quantum Design VSM MPMS3 system. Magnetization decay curves such as shown in Fig. S6 were fitted with stretched exponential function:

$$M(t) = M_{eq} + (M_0 - M_{eq}) \exp \left[ - \left( \frac{t}{\tau_M} \right)^\beta \right]$$

Where  $M_{eq}$  and  $M_0$  are the equilibrium and initial magnetizations, respectively,  $\tau_M$  is a characteristic relaxation time and  $\beta$  is an additional parameter that corresponds to the time-dependent decay rate. Determined relaxation times and  $\beta$  parameters are listed in Tables S3 and S4.

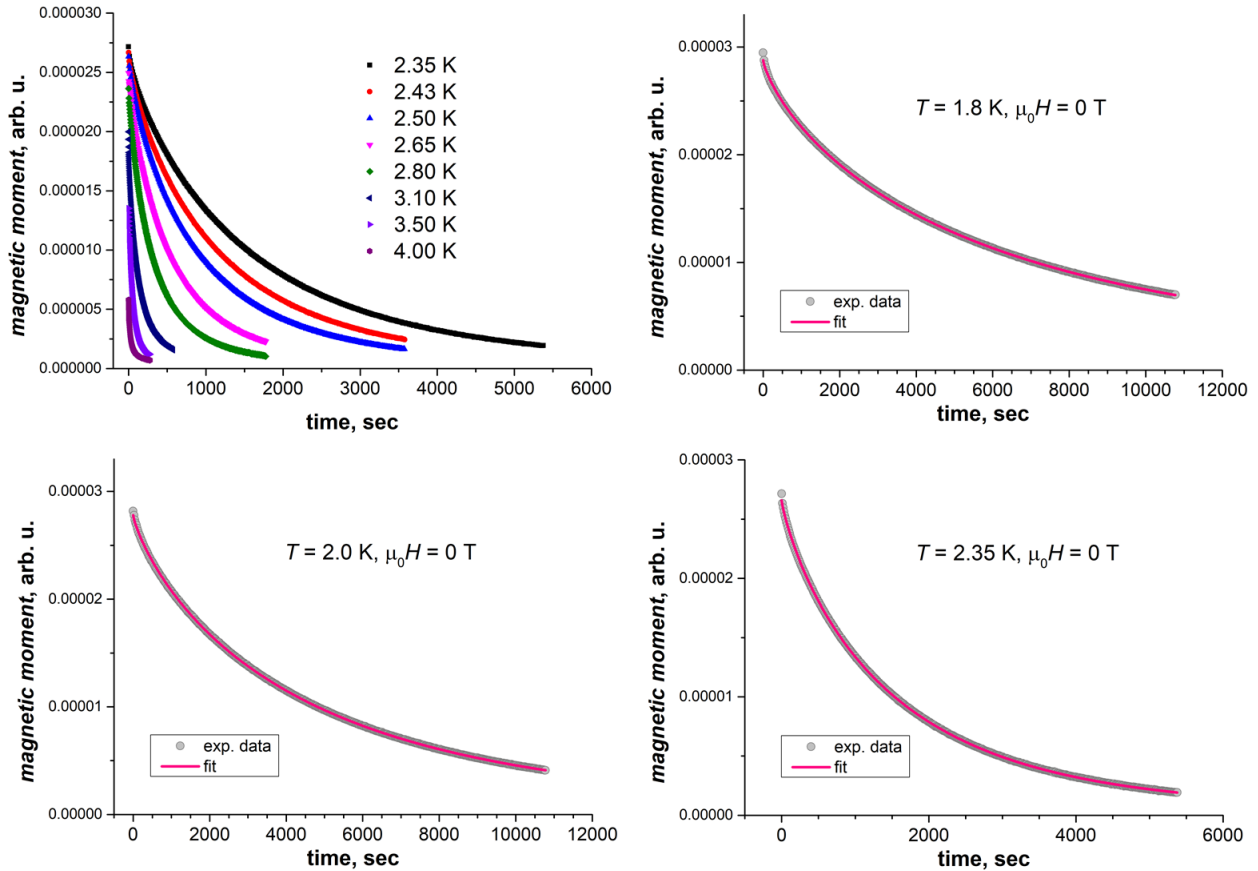

**Figure S6.** Representative magnetization decay curves measured in zero field at different temperatures and examples of fitting of experimental data with stretched exponentials.

**Table S3.** Magnetization relaxation times  $\tau_M$  measured at different temperatures.\*

| T, K | $\tau_M$ , s @<br>0 T | $\beta$ | $\tau_M$ , s @<br>0.1 T | $\beta$ | $\tau_M$ , s @<br>7 T $\rightarrow$ 2 T | $\beta$ | $\tau_M$ , s @<br>0 T $\rightarrow$ 2 T | $\beta$ |
|------|-----------------------|---------|-------------------------|---------|-----------------------------------------|---------|-----------------------------------------|---------|
| 1.8  | 5942                  | 0.77    | 47863                   | 0.52    | 45.5                                    | 1       | 185.3                                   | 0.53    |
| 1.85 |                       |         | 26128                   | 0.56    |                                         |         |                                         |         |
| 1.9  | 5366                  | 0.78    | 21445                   | 0.60    | 47.0                                    | 0.65    | 218.5                                   | 0.51    |
| 1.95 |                       |         | 13550                   | 0.69    |                                         |         |                                         |         |
| 2    | 4502                  | 0.81    | 8366                    | 0.75    | 45.8                                    | 0.77    | 172.6                                   | 0.60    |
| 2.1  | 3518                  | 0.81    | 5833                    | 0.81    | 48.1                                    | 0.66    | 202.7                                   | 0.56    |
| 2.2  | 2521                  | 0.79    | 4124                    | 0.80    | 46.6                                    | 0.57    | 175.1                                   | 0.65    |
| 2.27 | 2020                  | 0.84    | 2938                    | 0.81    |                                         |         |                                         |         |
| 2.35 | 1522                  | 0.84    | 2004                    | 0.82    | 46.2                                    | 0.78    | 155.5                                   | 0.63    |
| 2.43 | 1143                  | 0.84    | 1392                    | 0.83    |                                         |         |                                         |         |
| 2.5  | 888                   | 0.82    | 1040                    | 0.82    | 48.0                                    | 0.51    | 149.0                                   | 0.60    |
| 2.57 | 716                   | 0.84    | 787                     | 0.81    |                                         |         |                                         |         |
| 2.65 | 524                   | 0.84    | 567                     | 0.83    | 42.0                                    | 0.75    | 110.9                                   | 0.71    |
| 2.7  | 432                   | 0.87    |                         |         |                                         |         |                                         |         |
| 2.73 | 409                   | 0.80    | 427                     | 0.82    |                                         |         |                                         |         |
| 2.8  | 320                   | 0.77    | 331                     | 0.80    | 45.0                                    | 0.74    | 105.0                                   | 0.76    |
| 2.9  | 248                   | 0.82    | 239                     | 0.84    |                                         |         |                                         |         |
| 3    | 165                   | 0.89    | 176                     | 0.86    | 37.7                                    | 0.69    | 68.8                                    | 0.63    |
| 3.1  | 130                   | 0.81    | 133                     | 0.84    |                                         |         |                                         |         |
| 3.25 | 97.9                  | 0.83    | 88.7                    | 0.85    | 33.1                                    | 0.55    | 74.6                                    | 0.65    |
| 3.37 | 70.5                  | 0.82    | 70.3                    | 0.82    |                                         |         |                                         |         |
| 3.5  | 50.0                  | 0.74    | 51.1                    | 0.76    | 33.6                                    | 0.63    |                                         |         |
| 3.65 | 44.1                  | 0.78    | 39.6                    | 0.86    | 37.0                                    | 0.59    |                                         |         |
| 3.8  | 37.6                  | 0.69    | 35.2                    | 0.67    | 38.1                                    | 0.75    |                                         |         |
| 4    | 23.2                  | 0.56    | 25.2                    | 0.57    |                                         |         |                                         |         |

\* 7 T  $\rightarrow$  2 T and 0 T  $\rightarrow$  2 T indicates measurements at 2 T after ramping the field from 7 T or from 0 T.

**Table S4.** Relaxation times  $\tau_M$  measured at  $T = 2.5$  K in different magnetic fields. Two sets are measurements for the field ramped from 7 T to the required values ( $7\text{ T} \rightarrow \mu_0 H$ ) and from zero field to the required value ( $0\text{ T} \rightarrow \mu_0 H$ )

| $\mu_0 H, \text{ T}$ | $\tau_M, \text{ s}; 7\text{ T} \rightarrow \mu_0 H$ | $\beta$ | $\tau_M, \text{ s}; 0\text{ T} \rightarrow \mu_0 H$ | $\beta$ |
|----------------------|-----------------------------------------------------|---------|-----------------------------------------------------|---------|
| 0.025                | 822                                                 | 0.68    | 586                                                 | 0.63    |
| 0.05                 | 862                                                 | 0.68    | 707                                                 | 0.62    |
| 0.075                | 902                                                 | 0.67    | 749                                                 | 0.61    |
| 0.1                  | 1050                                                | 0.84    | 1050                                                | 0.74    |
| 0.2                  | 993                                                 | 0.86    | 1011                                                | 0.75    |
| 0.3                  | 892                                                 | 0.85    | 858                                                 | 0.68    |
| 0.4                  | 743                                                 | 0.83    | 737                                                 | 0.75    |
| 0.5                  | 625                                                 | 0.82    | 638                                                 | 0.73    |
| 0.6                  | 525                                                 | 0.78    | 525                                                 | 0.76    |
| 0.7                  | 439                                                 | 0.76    | 412                                                 | 0.68    |
| 0.8                  | 382                                                 | 0.72    | 366                                                 | 0.74    |
| 1                    | 284                                                 | 0.66    | 273                                                 | 0.69    |
| 1.2                  | 252                                                 | 0.65    | 218                                                 | 0.68    |
| 1.4                  | 217                                                 | 0.70    | 183                                                 | 0.65    |
| 1.6                  | 143                                                 | 0.58    | 166                                                 | 0.64    |
| 1.8                  | 72.8                                                | 0.67    | 155                                                 | 0.62    |
| 2                    | 44.9                                                | 0.58    | 149                                                 | 0.60    |
| 2.2                  | 49.5                                                | 0.56    | 148                                                 | 0.59    |
| 2.3                  | 92.5                                                | 0.69    |                                                     |         |
| 2.4                  | 137                                                 | 0.51    | 143                                                 | 0.59    |
| 2.6                  | 188                                                 | 0.51    | 144                                                 | 0.59    |
| 2.8                  | 148                                                 | 0.55    | 112                                                 | 0.61    |
| 3                    | 113                                                 | 0.56    | 87                                                  | 0.59    |

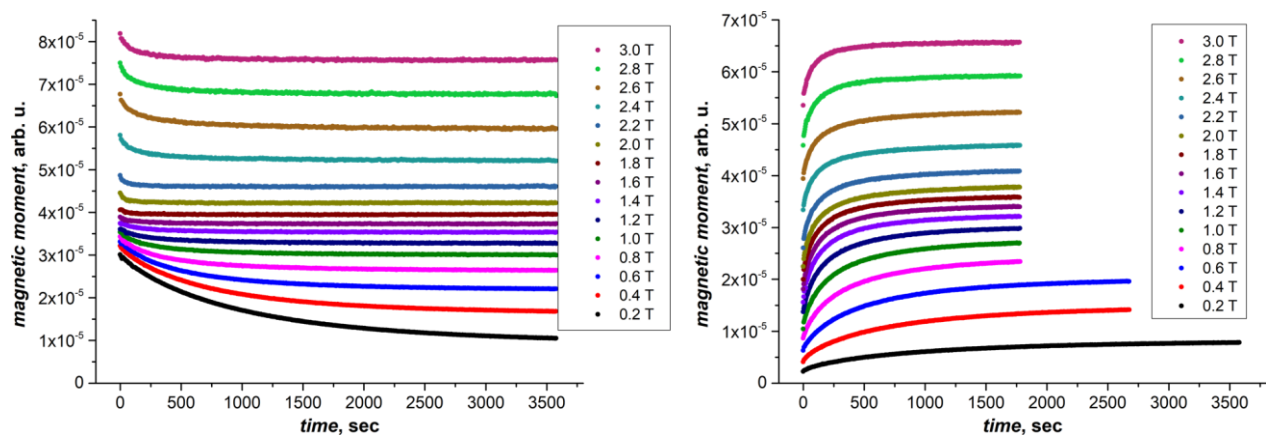

**Figure S7a.** Relaxation of magnetization at 2.5 K measured after ramping magnetic field from 7 T (left) and 0 T (right)

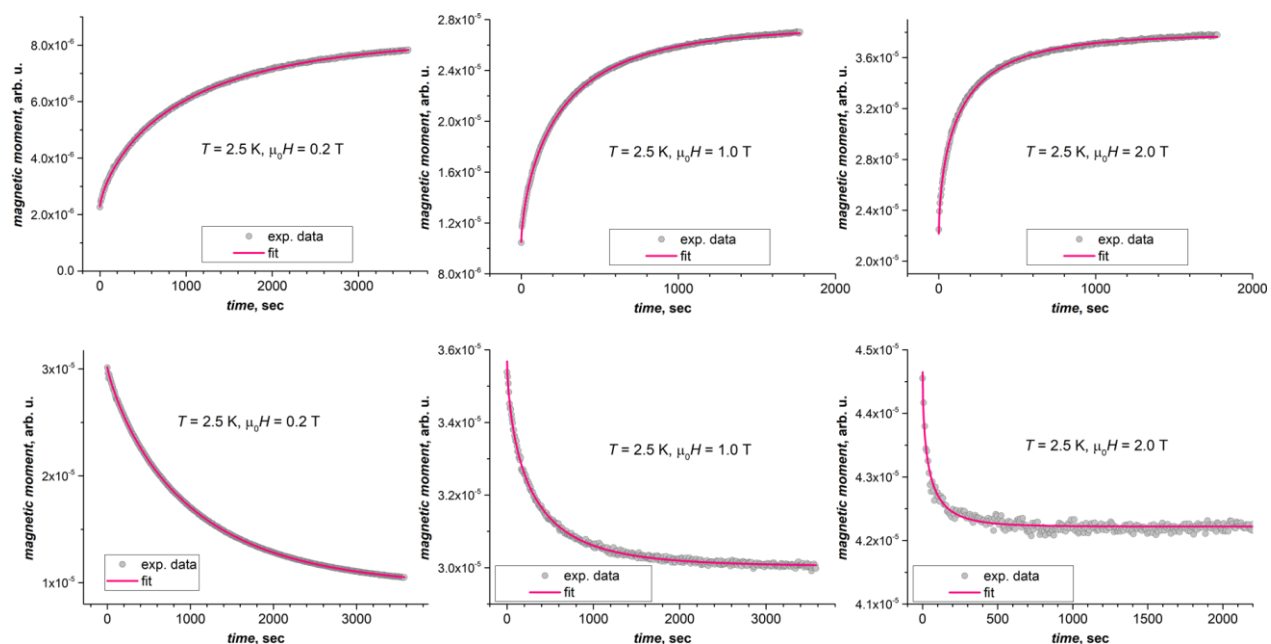

**Figure S7b.** Representative examples of fitting the curves from Fig. S7a with stretched exponential functions. Relaxation times and  $\beta$  parameters are listed in Table S4.

### Additional discussion of relaxation mechanism

For the measurement of relaxation time at 2 T, we see almost no dependence for times measured after the field ramp from 7 T, but do observe some dependence for the measurements after the field ramp from 0 T. The temperature dependence can be described by a power function,  $\tau_M^{-1} = CT^n$ , with  $C = 0.0014 \pm 0.0003 \text{ s}^{-1}\text{K}^{-n}$  and  $n = 1.91 \pm 0.24$ . The exponent is rather small, and can point to a direct mechanism or direct with phonon bottleneck, but the Raman contribution cannot be excluded either. The difference of the temperature dependence of the relaxation time for the samples with different prehistory agrees with the absence of a sharp dip in relaxation times near 2 T for the times measured after the ramp from 0 T (and appearance of such a dip if the field is ramped from 7 T). Both phenomena indicate that after the ramp from 7 T, the main relaxation mechanism at 2 T is the QTM, whereas when the field is ramped from 0 T, the QTM is not that pronounced. However, we should note that in both cases the  $\beta$  values are rather small and the spread of values is also noticeable so that precise determination of the mechanism is hardly possible.

The different apparent mechanism for the decay and saturation of magnetization at 2 T may be preliminary explained as follows. When the field is ramped from 7 T, the system, which is in the  $|FM_+\rangle$  state, first goes through the  $|FM_+\rangle \leftrightarrow |AFM_+\rangle$  crossing (point B in Fig. 5b), at which point partial equilibration should take place. But some molecules remain in the state  $|FM_+\rangle$  beyond this point and then undergo fast relaxation at the crossing of type  $|FM_+\rangle \leftrightarrow |AFM_-\rangle$  (point A in Fig. 5b). This second process we observe with the dip of  $\tau_M$  in the field dependence. When the field is ramped from 0 T, the first crossing type is  $|FM_+\rangle \leftrightarrow |AFM_-\rangle$ , but the equilibration to the state  $|AFM_+\rangle$  remains inaccessible for the QTM and requires thermal relaxation mechanism.

### Magnetic measurements

The fullerene sample for magnetic measurements in the amount of  $\sim 0.1$  mg was drop-casted onto quartz holder from  $\text{CS}_2$  solution. The use of this sample preparation approach in the situation of the limited sample amount was found superior to the use of standard propylene capsules due to much lower background provided by homogeneous quartz holders. However, this technique limits the amount of the sample to  $\sim 0.1$  mg because adhesion of the larger sample amount is not good enough and leads to detachment during the VSM measurement, whereas the use of glue or past again increases the diamagnetic signal. As this sample amount was not sufficient for reliable mass determination, in the fitting we relied on the shape of the magnetization curves rather than on the absolute signal.

### Magnetic hysteresis and its derivative

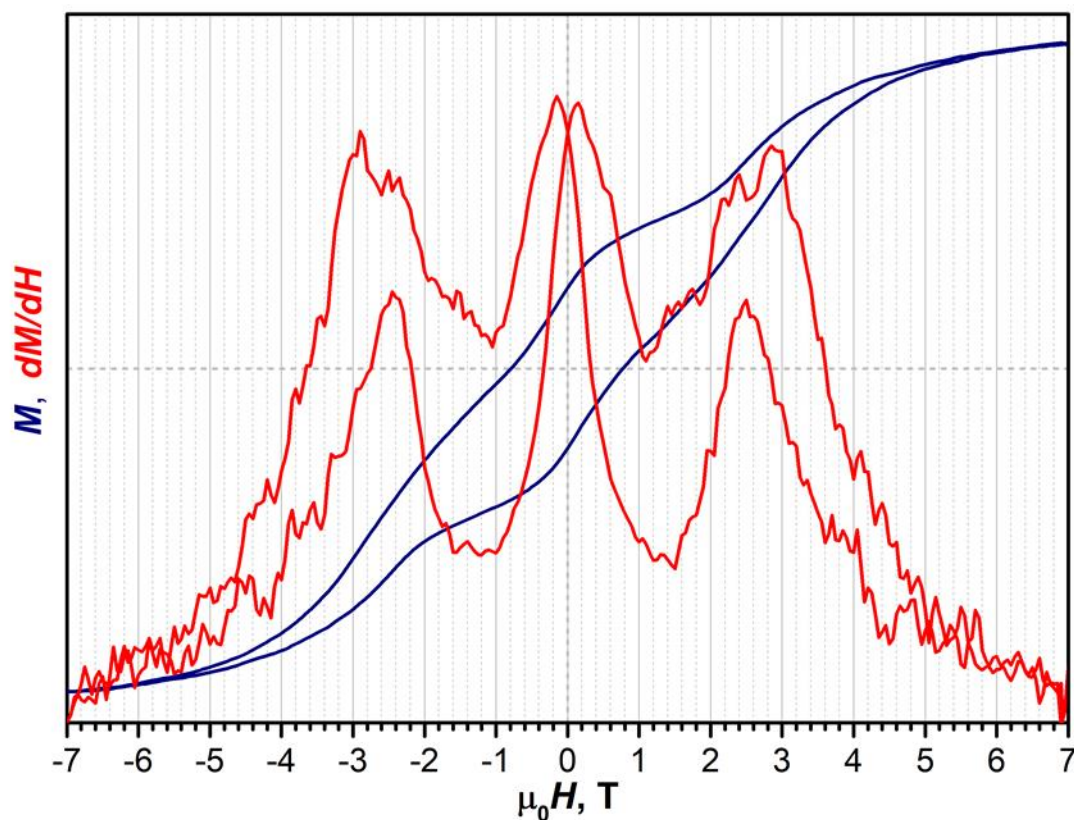

**Figure S8.** Magnetic hysteresis (dark blue) measured at 1.8 K and its derivative (red).

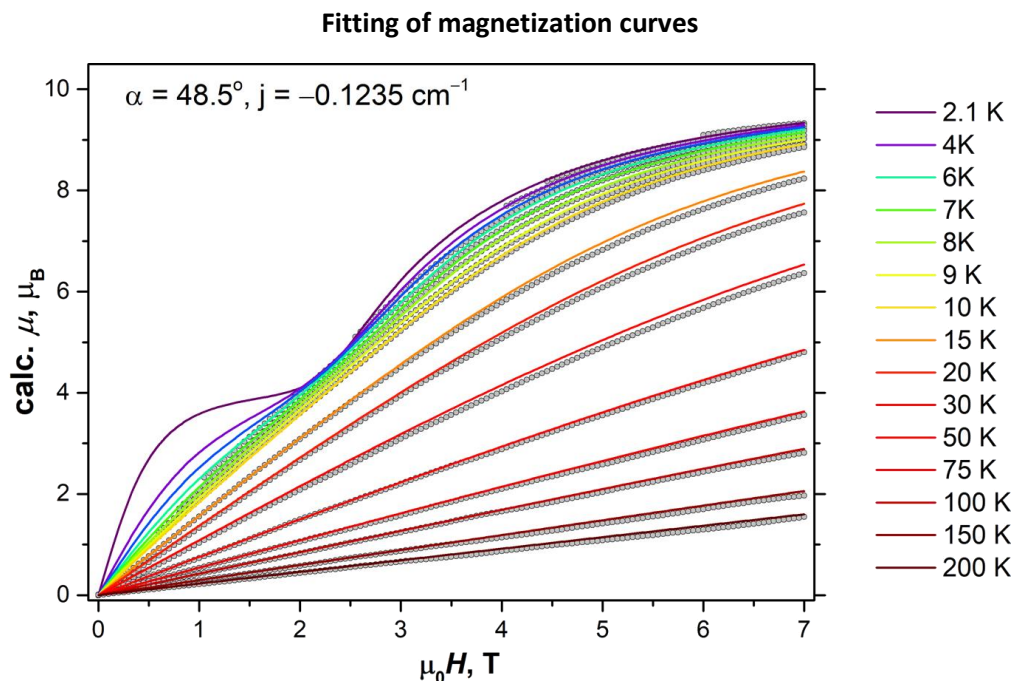

**Figure S9.** Experimental magnetization data used in the fitting (gray dots), and fitted calculated magnetization curves (colored lines) of  $\text{Dy}_2\text{O}@\text{C}_{80}$ . Note that the fit used only experimental data from the field range, at which magnetic hysteresis is already closed. This means that for the lowest temperatures only the highest fields ( $>5$  T) were used.

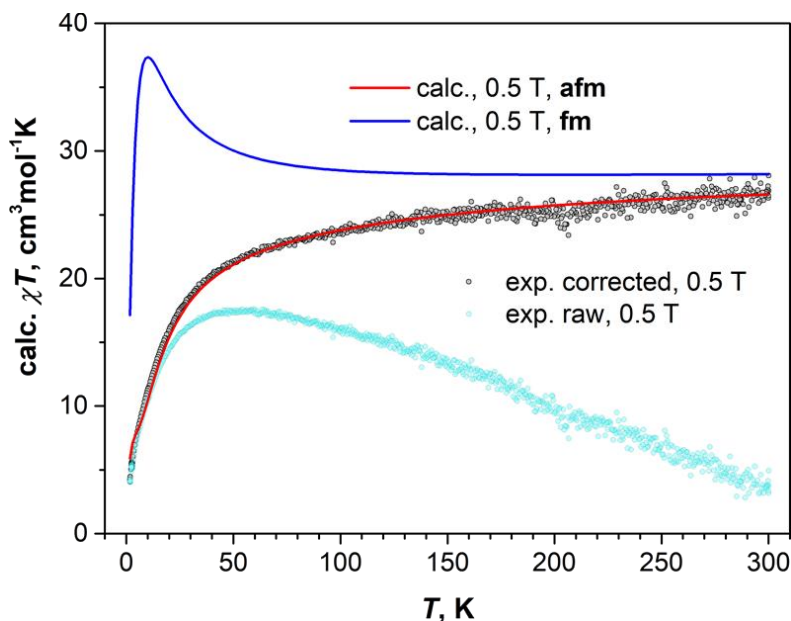

**Figure S10.** Comparison of experimental  $\chi T$  data to calculated ones. Magnetic susceptibility  $\chi$  is defined as  $M/H$ , measured at 0.5 T, linear baseline correction was applied to correct for the diamagnetic drift (gray dots – after correction, light blue dots – raw data). Calculations were done for the fitted  $j_{12}$  and  $\alpha$  parameters. In addition to  $j_{12} = -0.12 \text{ cm}^{-1}$  (**afm** coupling), calculations were also performed for  $j_{12} = +0.12 \text{ cm}^{-1}$  (**fm** coupling). The figure clearly shows that **fm** coupling should give a strong peak in the  $\chi T$  curve, which is not observed in experimental data.

### Two types of Zeeman diagram and crossing histograms

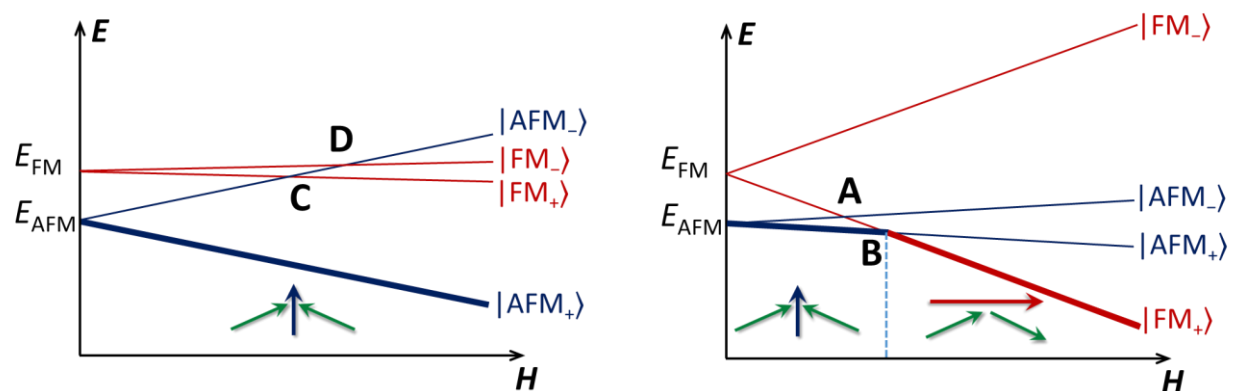

**Figure S11.** Zeeman diagram for  $Dy_2O@C_{80}$  for two orientations of the magnetic field. Left: the field is nearly parallel to the magnetic moment of the AFM state;  $|AFM_+\rangle$  remains ground state in all positive fields. Right: the field is nearly parallel to the magnetic moment of the FM state;  $|AFM_+\rangle$  is the ground state in low fields, but  $|FM_+\rangle$  becomes the ground state at higher fields, after level crossing of type B. In both figures, AFM and FM levels are plotted in red and dark blue, respectively. The ground state is highlighted by a thicker line.

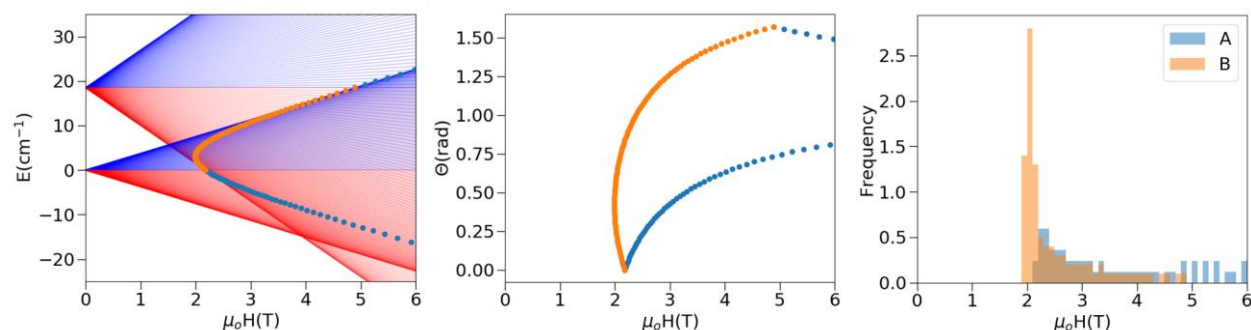

**Figure S12.** An overview of crossing events obtained with analytical model (i.e. considering that Dy moment are purely Ising spins). Note that crossing of type A (orange dots) has higher distribution density but is distributed in a narrower field range, whereas the crossing of type B (blue dots) has more sparse distributions but is distributed over a broader field range. This difference between A and B distributions depends on the angle between magnetic moments. The closer angle to  $180^\circ$ , the more different distributions are.
